# Supplementary material for: Downregulation of ACE2 expression by SARS-CoV-2 worsens the prognosis of KIRC and KIRP patients via metabolism and immunoregulation
Source: PubMed Central journal article supplement (PMC8193256; doi:10.7150/ijbs.57802), 2021-05-10

**SUPPLEMENTARY TABLES**

**Supplementary Table 1. Univariate and multivariate analyses of clinicopathological characteristics and ACE2 expression for overall survival in KIRC patients from the TCGA dataset. (N=526)**

| Variables       | Total<br>n= 526 (%) | Univariate analysis |       | Multivariate analysis |     |
|-----------------|---------------------|---------------------|-------|-----------------------|-----|
|                 |                     | HR (95% CI)         | P     | HR (95% CI)           | P   |
| Age             |                     |                     |       |                       |     |
| <60             | 245 (46.6%)         | 1 (Reference)       |       | 1 (Reference)         |     |
| ≥60             | 281 (53.4%)         | 1.782 (1.299-2.445) | ***   | 1.536(1.112-2.120)    | **  |
| Sex             |                     |                     |       |                       |     |
| Female          | 183 (34.7%)         | 1(Reference)        |       |                       |     |
| Male            | 343 (65.2%)         | 0.960 (0.702-1.314) | 0.799 |                       |     |
| TNM Stage       |                     |                     |       |                       |     |
| I+II            | 318 (60.5%)         | 1 (Reference)       |       | 1 (Reference)         |     |
| III+IV          | 205 (38.9%)         | 3.924 (2.843-5.416) | ***   | 5.409 (2.871-10.192)  | *** |
| Missing         | 3 (0.6%)            |                     |       |                       |     |
| T Stage         |                     |                     |       |                       |     |
| T1+T2           | 336 (63.9%)         | 1 (Reference)       |       | 1 (Reference)         |     |
| T3+T4           | 190 (36.1%)         | 3.259 (2.395-4.435) | ***   | 0.495 (0.268-0.914)   | *   |
| Tumor grade     |                     |                     |       |                       |     |
| G1+G2           | 239 (45.4%)         | 1 (Reference)       |       | 1 (Reference)         |     |
| G3              | 279 (53.1%)         | 2.769 (1.953-3.926) | ***   | 1.773 (1.224-2.567)   | **  |
| Missing         | 8 (1.5%)            |                     |       |                       |     |
| ACE2 Expression |                     |                     |       |                       |     |
| Low             | 263 (50%)           | 1 (Reference)       |       | 1 (Reference)         |     |
| High            | 263 (50%)           | 0.486 (0.355-0.666) | ***   | 0.534 (0.388-0.737)   | *** |

Characteristics with significant *P* values in univariate analysis were screened in multivariate analysis. HR, hazard ratio; CI, confidence interval; TNM, tumor-node-metastasis; KIRC, kidney renal clear cell carcinoma. \* *P*<0.05; \*\* *P*<0.01; \*\*\* *P*<0.001.

**Supplementary Table 2. Univariate and multivariate analyses of clinicopathological characteristics and ACE2 expression for overall survival in KIRP patients from the TCGA dataset. (N=285)**

| Variables       | Total<br>n=285 (%) | Univariate analysis     |       | Multivariate analysis |       |
|-----------------|--------------------|-------------------------|-------|-----------------------|-------|
|                 |                    | HR (95% CI)             | P     | HR (95% CI)           | P     |
| Age             |                    |                         |       |                       |       |
| <60             | 118 (41.4%)        | 1 (Reference)           |       |                       |       |
| ≥60             | 165 (57.9%)        | 1.057 (0.571-1.958)     | 0.860 |                       |       |
| Missing         | 2 (0.7%)           |                         |       |                       |       |
| Sex             |                    |                         |       |                       |       |
| Female          | 76 (26.7%)         | 1(Reference)            |       |                       |       |
| Male            | 209 (73.3%)        | 0.609 (0.316-1.173)     | 0.138 |                       |       |
| TNM Stage       |                    |                         |       |                       |       |
| I+II            | 202 (70.9%)        | 1 (Reference)           |       | 1 (Reference)         |       |
| III+IV          | 65 (22.8%)         | 6.747<br>(3.503-12.995) | ***   | 6.061 (2.610-14.076)  | ***   |
| Missing         | 18 (6.3%)          |                         |       |                       |       |
| T Stage         |                    |                         |       |                       |       |
| T1+T2           | 233 (81.8%)        | 1 (Reference)           |       | 1 (Reference)         |       |
| T3+T4           | 48 (16.8%)         | 4.510 (2.399-8.478)     | ***   | 1.040 (0.452-2.397)   | 0.926 |
| Missing         | 4 (1.4%)           |                         |       |                       |       |
| ACE2 Expression |                    |                         |       |                       |       |
| Low             | 142 (49.8%)        | 1 (Reference)           |       | 1 (Reference)         |       |
| High            | 143 (49.2%)        | 0.516 (0.276-0.964)     | *     | 0.561 (0.286-1.102)   | 0.094 |

Characteristics with significant *P* values in univariate analysis were screened in multivariate analysis. HR, hazard ratio; CI, confidence interval; TNM, tumor-node-metastasis; KIRP, kidney renal papillary cell carcinoma. \**P*<0.05; \*\* *P*<0.01; \*\*\* *P*<0.001.

## **SUPPLEMENTARY FIGURE LEGENDS:**

**Supplementary Figure 1. The correlation between ACE2 expression and Copy Number Variation (A-B).** FDR, false discovery rate.

**Supplementary Figure 2. Correlation analysis between ACE2 and TMPRSS2 with clinical characteristics.** Sex, Race, Age, and TNM stage were analyzed in KIRC (A-B) and KIRP (C-D), respectively.

**Supplementary Figure 3. Survival analysis of 7-mutual co-expressed genes.**

Kaplan–Meier survival curves of 7-mutual co-expressed genes with ACE2 in KIRC (A) and KIRP (B) patients, respectively.

**A**

| Gene symbol | Cancer type | Spearman correlation | FDR  |
|-------------|-------------|----------------------|------|
| ACE2        | KIRC        | -0.09                | 0.06 |
| TMPRSS2     | KIRC        | -0.06                | 0.23 |
| ACE2        | KIRP        | 0.15                 | 0.02 |
| TMPRSS2     | KIRP        | 0.10                 | 0.16 |

**B**

Correlations of CNV with mRNA expression

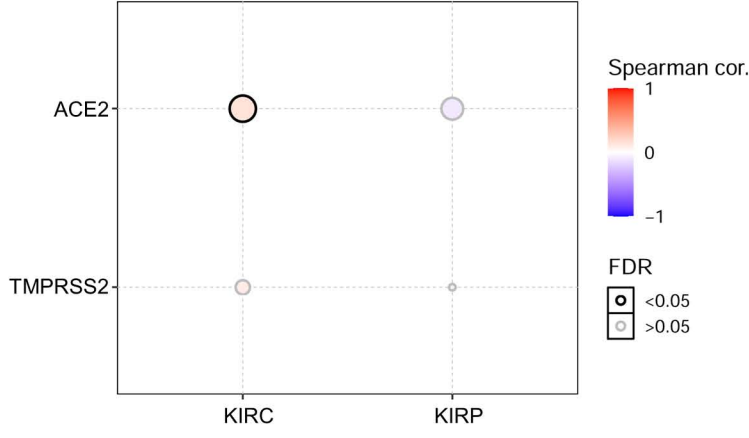

## KIRC

**A**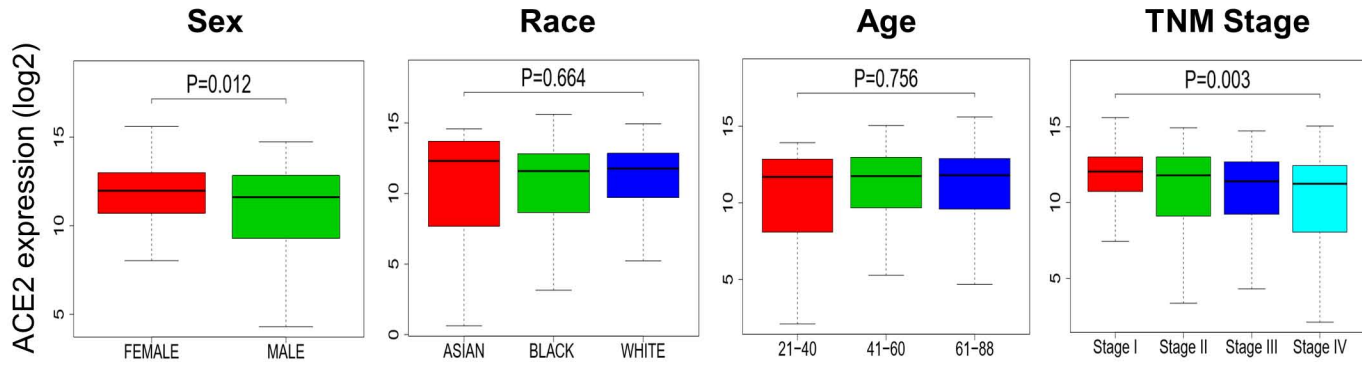**B**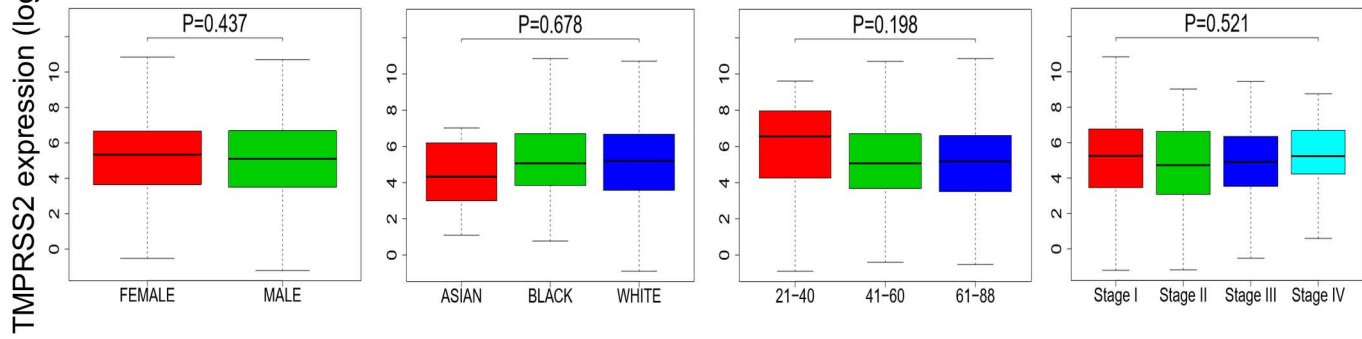

## KIRP

**C**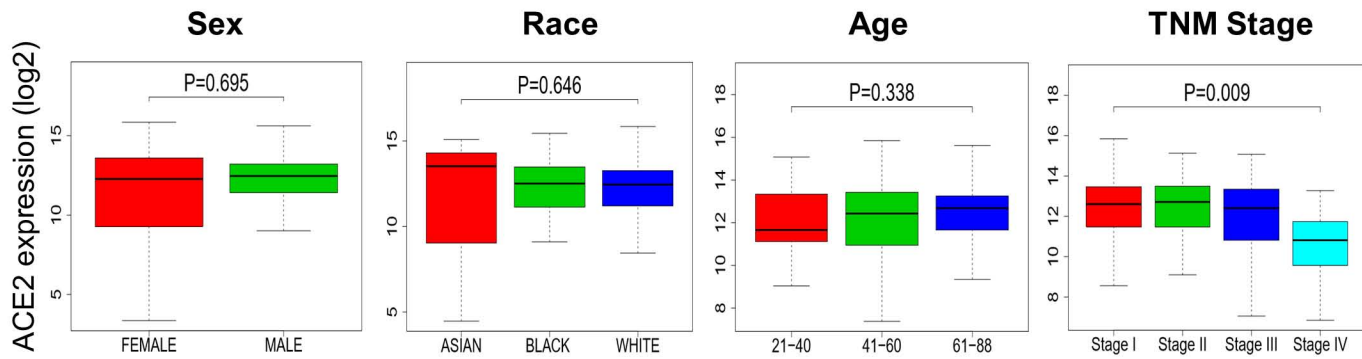**D**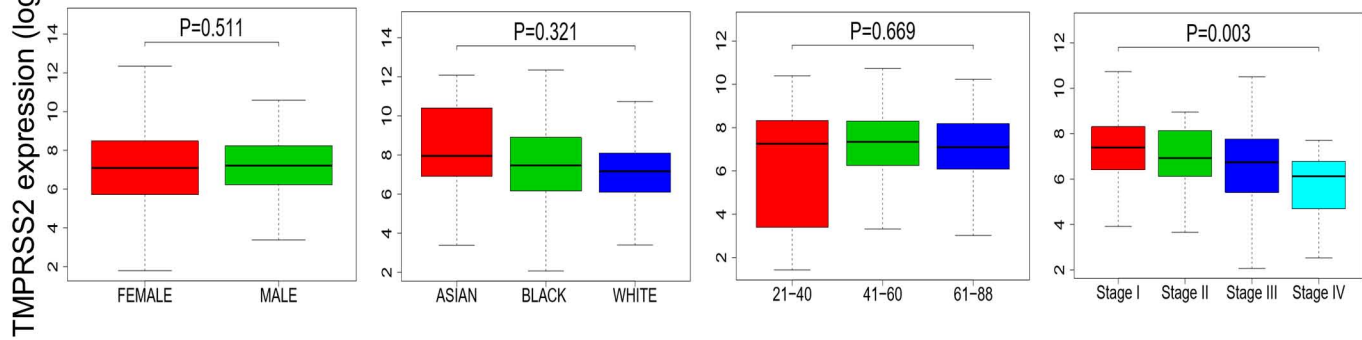

**A****KIRC**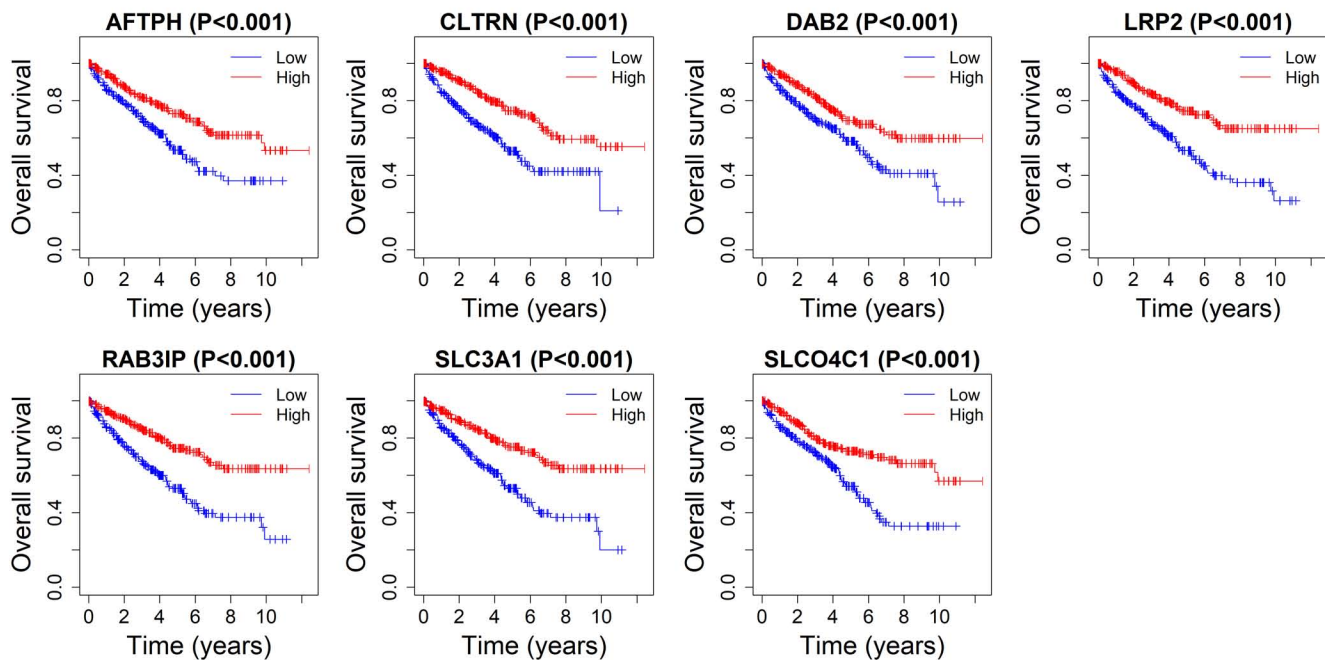**B****KIRP**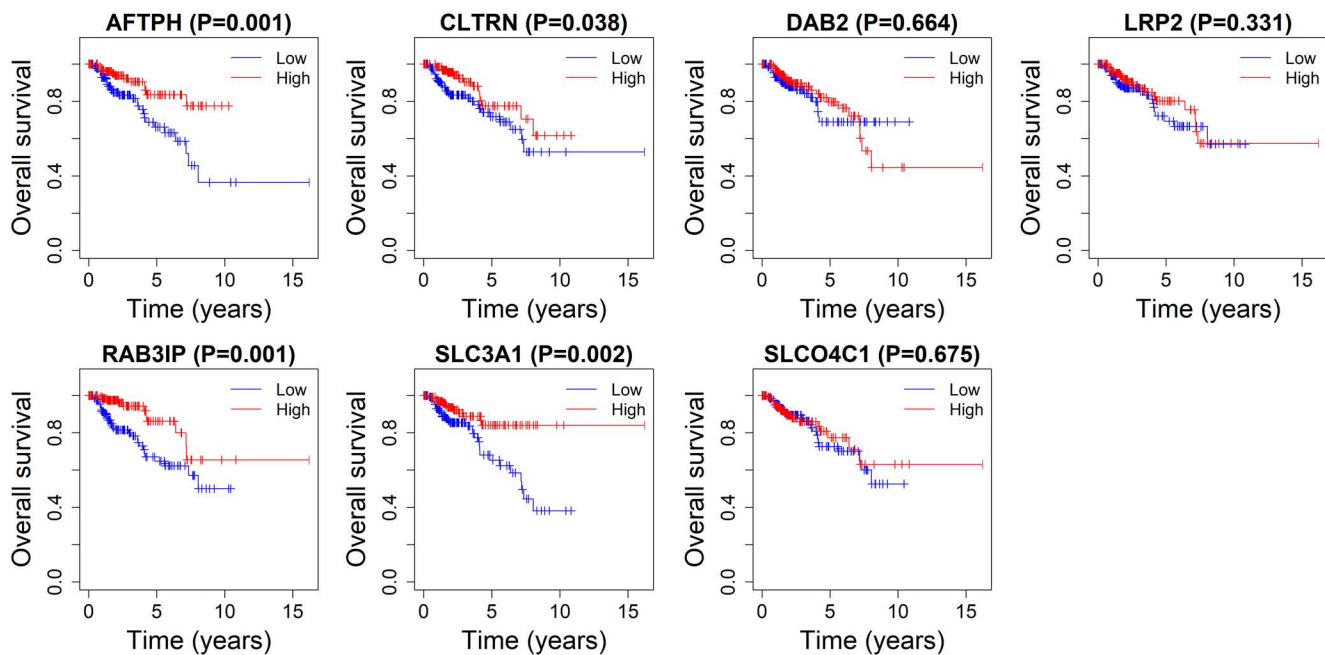

Supplement: ijbsv17p1925s1.pdf [file ijbsv17p1925s1.pdf]
